# Supplementary material for: Low Expression of FFAR2 in Peripheral White Blood Cells May Be a Genetic Marker for Early Diagnosis of Acute Myocardial Infarction
Source: Hindawi journal article supplement (doi:10.1155/2020/3108124), 2020-01-25
Supplement: f1 [file 3108124.f1.pdf]

**Figure 1 .** RT-PCR curve. A: RT-PCR amplification curve of the *FFAR2* gene; B: RT-PCR dissolution curve of the *FFAR2* gene

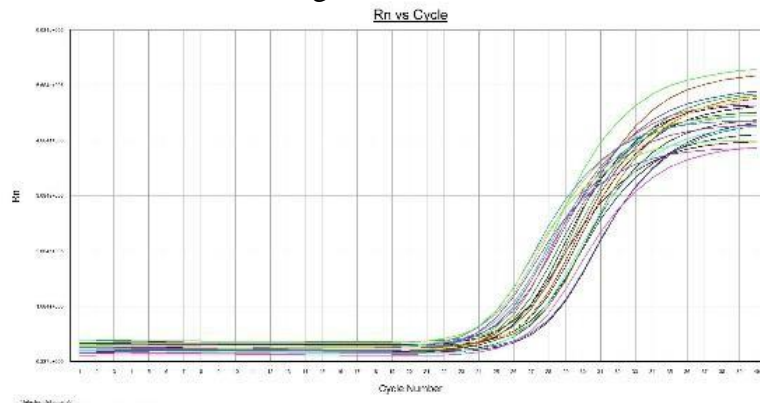

A: RT-PCR amplification curve of the *FFAR2* gene

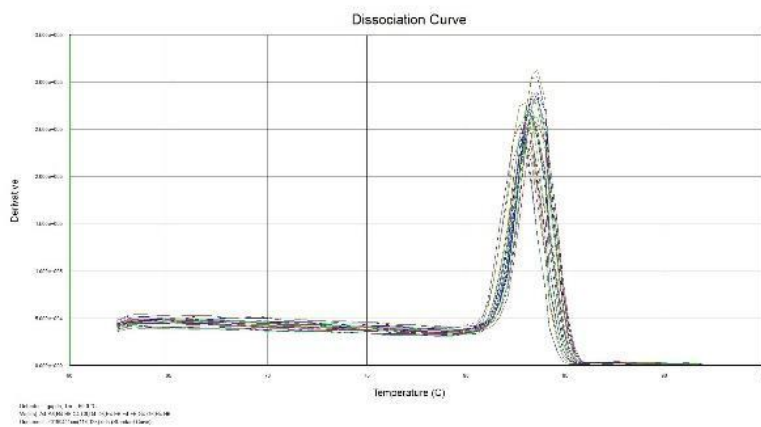

B: RT-PCR dissolution curve of the *FFAR2* gene
